# Supplementary material for: Phytochemical Profiles and Biological Activities of Plant Extracts from Aromatic Plants Cultivated in Cyprus
Source: MDPI journal article supplement (doi:10.3390/biology13010045), 2024-01-15
Supplement: s1 [file s1]

## Supplementary material

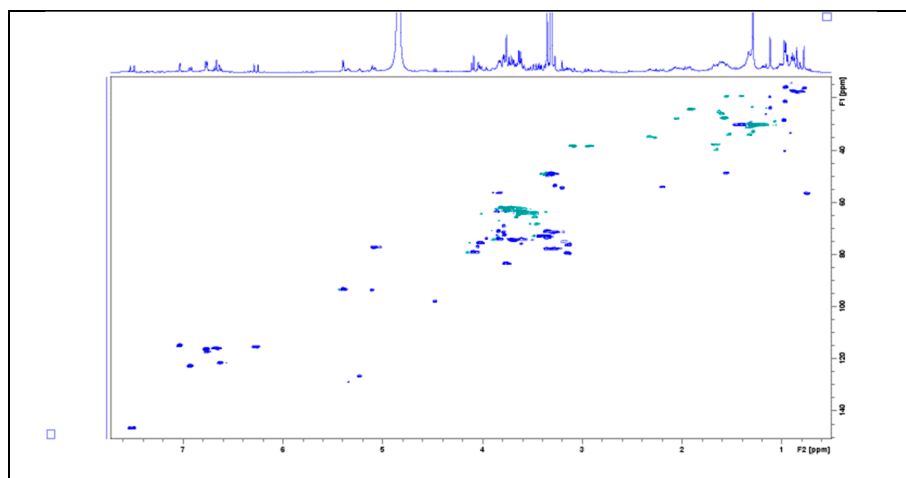

**Figure S1a.** HSQC spectrum of *M. officinalis*

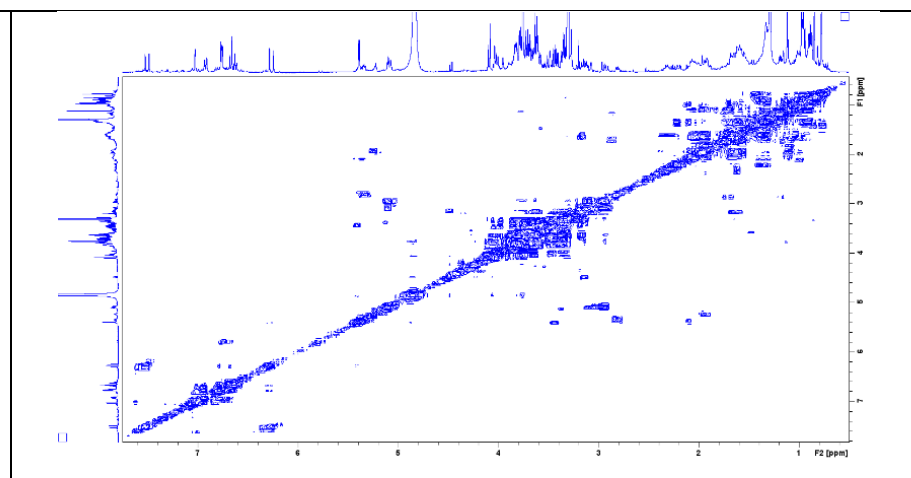

**Figure S1b.**  $^1\text{H}$ - $^1\text{H}$ -COSY spectrum of *M. officinalis*

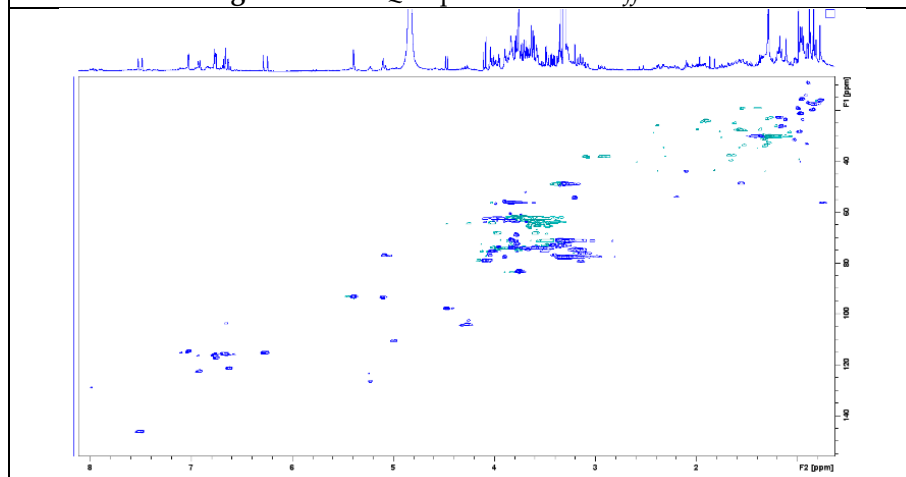

**Figure S2a.** HSQC spectrum of *S. fruticosa*

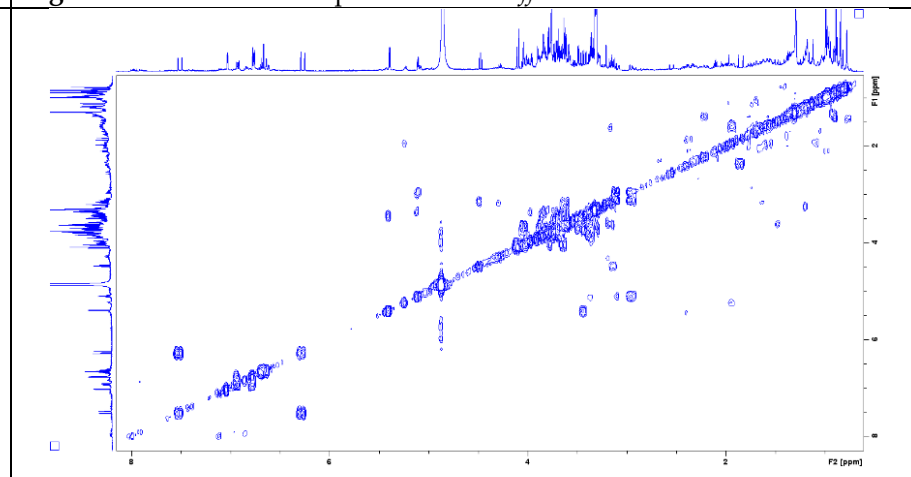

**Figure S2b.**  $^1\text{H}$ - $^1\text{H}$ -COSY spectrum of *S. fruticosa*

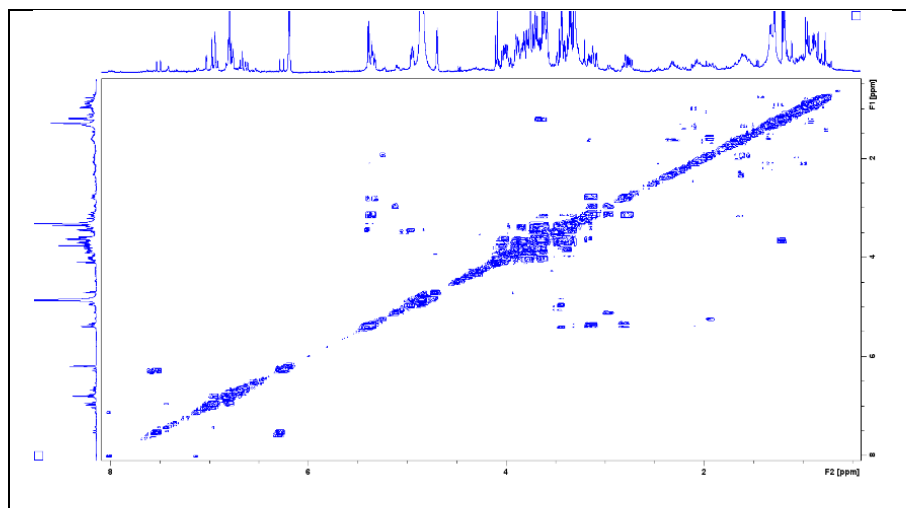

**Figure S3a.**  $^1\text{H}$ - $^1\text{H}$ -COSY spectrum of *M. piperita*

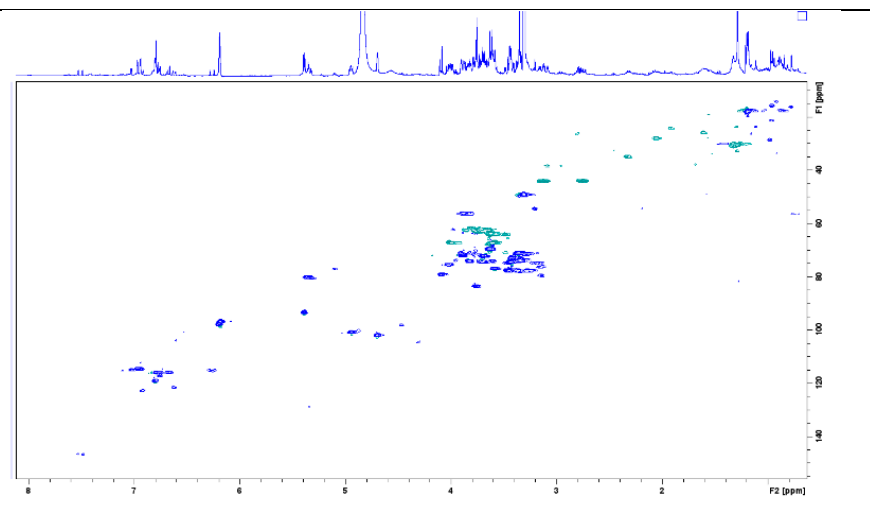

**Figure S3b.** HSQC spectrum of *M. piperita*

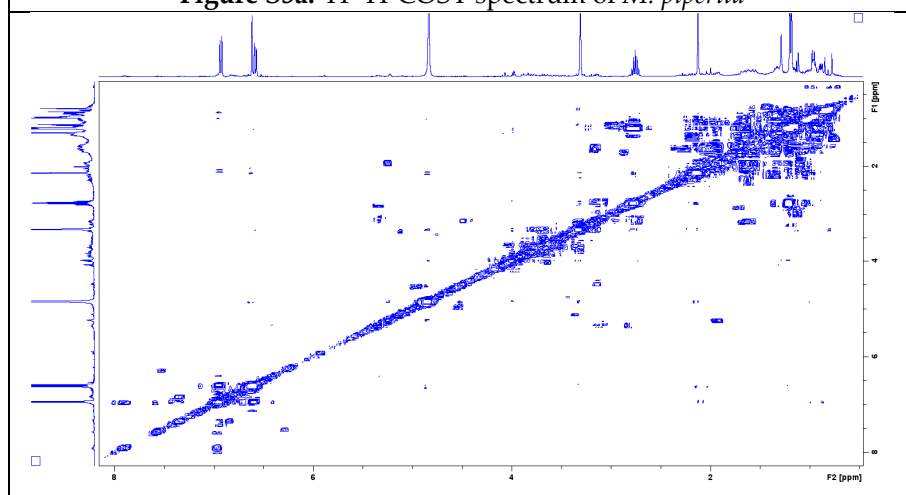

**Figure S4a.**  $^1\text{H}$ - $^1\text{H}$ -COSY spectrum of *O. dubium*

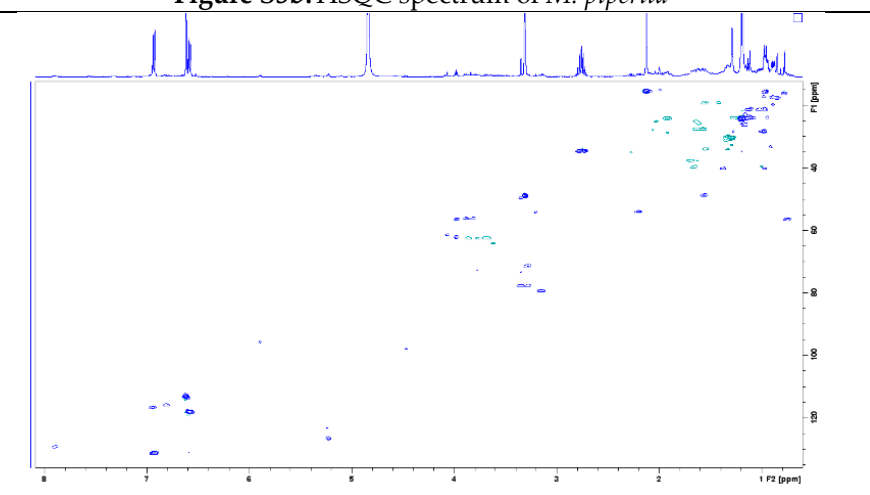

**Figure S4b.** HSQC spectrum of *O. dubium*

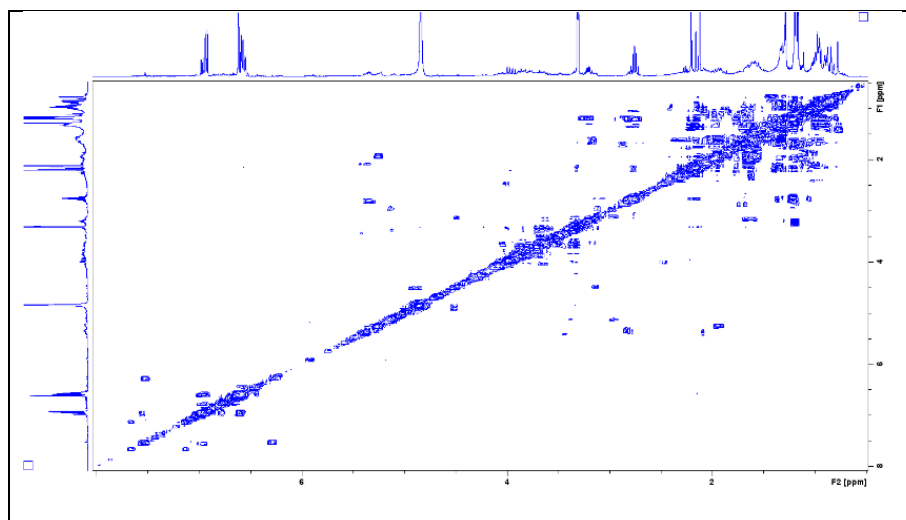

**Figure S5a.**  $^1\text{H}$ - $^1\text{H}$ -COSY spectrum of *T. capitatus*

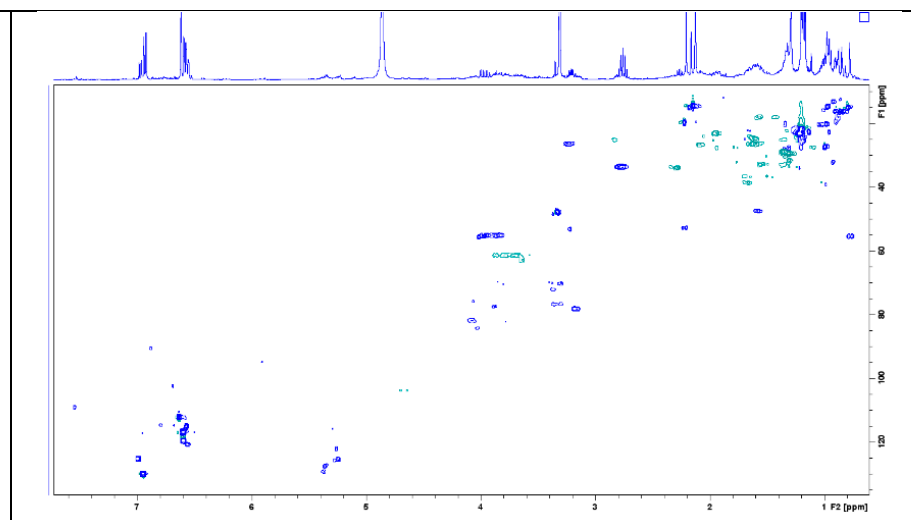

**Figure S5b.** HSQC spectrum of *T. capitatus*

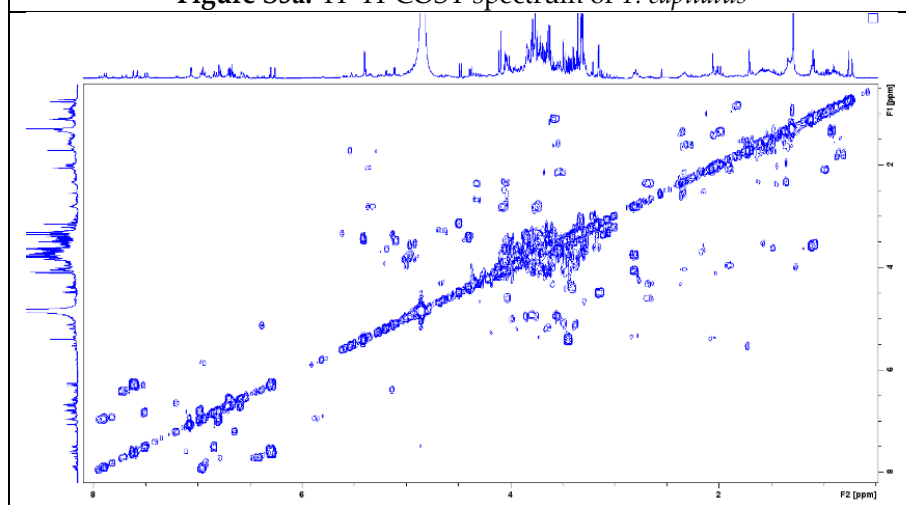

**Figure S6a.**  $^1\text{H}$ - $^1\text{H}$ -COSY spectrum of *S. cypria*

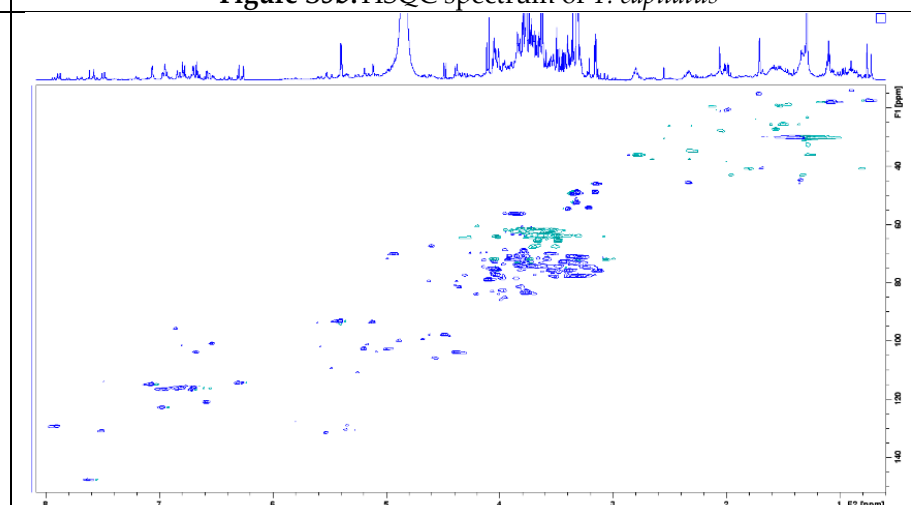

**Figure S6b.** HSQC spectrum of *S. cypria*
